# Supplementary material for: Early prediction of prostate cancer risk in younger men using polygenic risk scores and electronic health records
Source: PubMed Central journal article supplement (PMC9844630; doi:10.1002/cam4.4934), 2022-06-25
Supplement: CAM4-12-379-s001.pdf [file CAM4-12-379-s001.pdf]

## Supplementary Information

**Supplementary Table 1.** Input variables for the Features II, PRS + Features II, Features III, and PRS + Features III models. Abbreviations: body mass index (BMI), C-reactive protein (CRP), glycated hemoglobin (HbA1c), insulin-like growth factor 1 (IGF-1) and polygenic risk score (PRS).

|                              | <b>Machine Learning Model</b> |                             |                        |                              |
|------------------------------|-------------------------------|-----------------------------|------------------------|------------------------------|
| <b>Input Variables</b>       | <i>1) Features II</i>         | <i>2) PRS + Features II</i> | <i>3) Features III</i> | <i>4) PRS + Features III</i> |
| <b>Genetic</b>               |                               | PRS                         |                        | PRS                          |
| <b>Demographics</b>          | Age                           | Age                         | Age                    | Age                          |
|                              | Father's history              | Father's history            | Father's history       | Father's history             |
|                              | Sibling history               | Sibling history             | Sibling history        | Sibling history              |
|                              | Ethnicity                     | Ethnicity                   | Ethnicity              | Ethnicity                    |
| <b>Clinical Measurements</b> | BMI                           | BMI                         | BMI                    | BMI                          |
| <b>Laboratory values</b>     | HbA1c                         | HbA1c                       | HbA1c                  | HbA1c                        |
|                              | CRP                           | CRP                         | CRP                    | CRP                          |
|                              | IGF-1                         | IGF-1                       | IGF-1                  | IGF-1                        |
| <b>Medical History</b>       | Smoking status                | Smoking status              | Smoking status         | Smoking status               |
|                              |                               |                             | Number of sex partners | Number of sex partners       |
|                              |                               |                             | Diabetes diagnosis     | Diabetes diagnosis           |
|                              |                               |                             | Diabetes medication    | Diabetes medication          |

**Supplementary Table 2.** Performance metrics of the Features II, PRS + Features II, Features III, and PRS + Features III models. Abbreviations: Area under the receiver operating characteristic (AUROC); diagnostic odds ratio (DOR); likelihood ratio positive (LR+), likelihood ratio negative (LR-), polygenic risk score (PRS).

|                    | <i>Features II only</i> | <i>PRS + Features II</i> | <i>Features III only</i> | <i>PRS + Features III</i> |
|--------------------|-------------------------|--------------------------|--------------------------|---------------------------|
| <b>AUROC</b>       | 0.742<br>(0.708, 0.774) | 0.788<br>(0.758, 0.819)  | 0.742<br>(0.708, 0.774)  | 0.788<br>(0.758, 0.819)   |
| <b>Sensitivity</b> | 0.800<br>(0.736, 0.864) | 0.800<br>(0.736, 0.864)  | 0.800<br>(0.736, 0.864)  | 0.800<br>(0.736, 0.864)   |
| <b>Specificity</b> | 0.560<br>(0.553, 0.567) | 0.629<br>(0.622, 0.636)  | 0.560<br>(0.553, 0.567)  | 0.629<br>(0.622, 0.636)   |
| <b>DOR</b>         | 5.095<br>(4.694, 5.496) | 6.783<br>(6.382, 7.184)  | 5.095<br>(4.694, 5.496)  | 6.783<br>(6.382, 7.184)   |
| <b>LR+</b>         | 1.819<br>(1.676, 1.974) | 2.157<br>(1.986, 2.341)  | 1.819<br>(1.676, 1.974)  | 2.157<br>(1.986, 2.341)   |
| <b>LR-</b>         | 0.357<br>(0.259, 0.492) | 0.318<br>(0.231, 0.438)  | 0.357<br>(0.259, 0.492)  | 0.318<br>(0.231, 0.438)   |

**Supplementary Figure 1.** SHapely Additive ExPlanations plots of the (A) Features I, (B) PRS + Features I, (C) Features II, (D) PRS + Features II model, and (E) Minimal Features models.

(A)

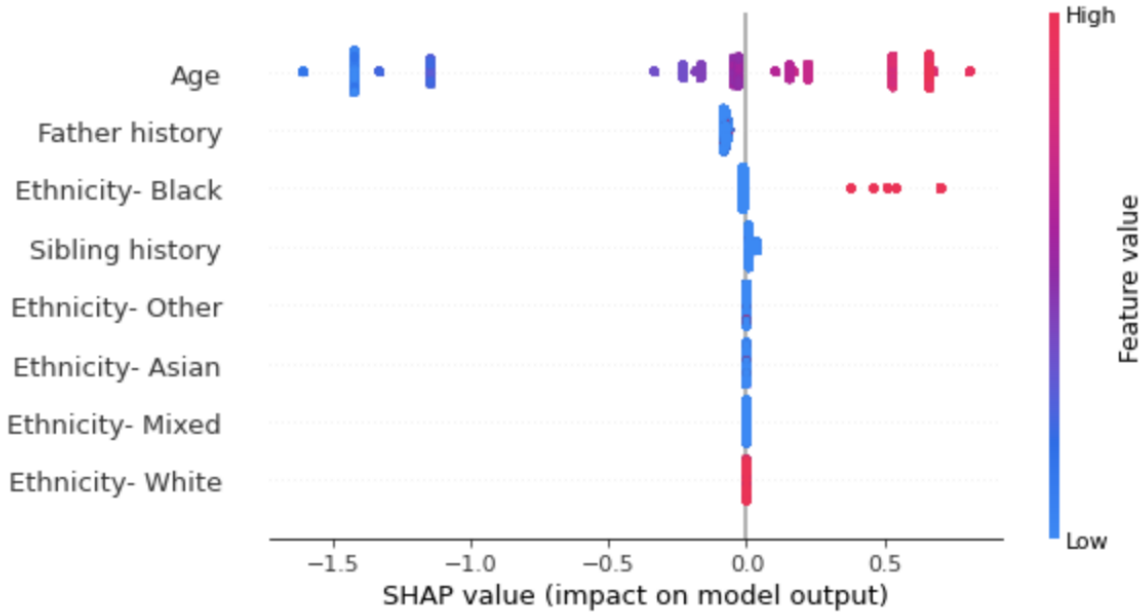

(B)

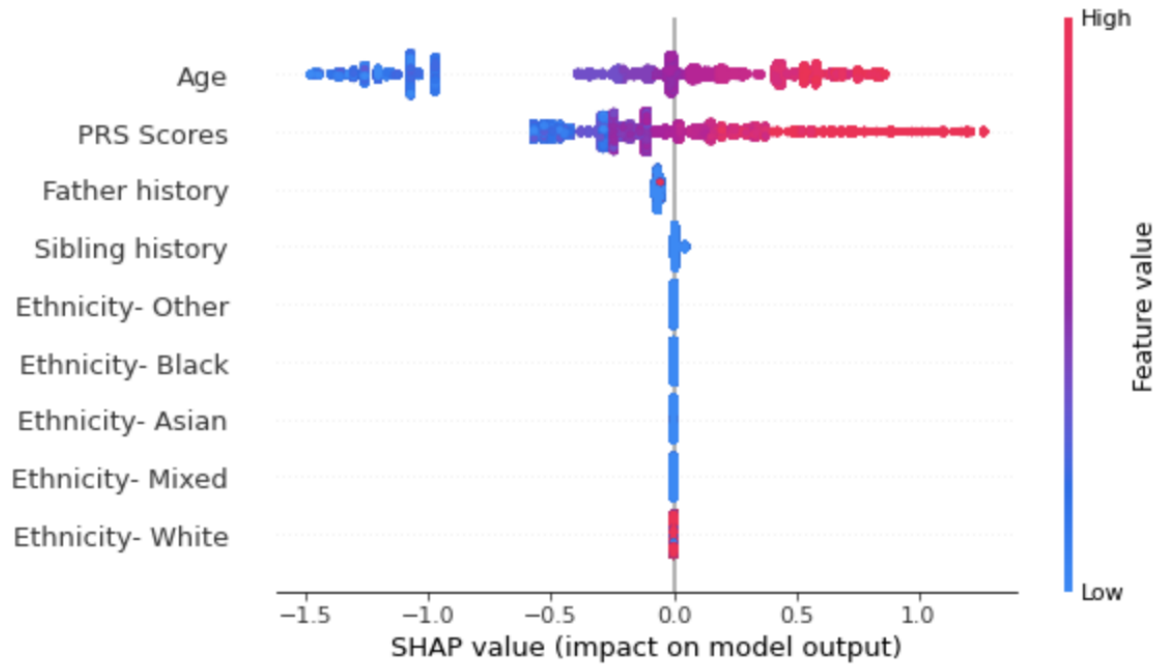

(C) Glycated hemoglobin in the Features II model was found to be a predictor of high importance, although combining the PRS data to this model substantially reduced its importance. The observed inverse relationship between HbA1c and PCa risk may be explained by the reduction of insulin growth factor and testosterone in diabetes, which can create a physiological environment that is unfavorable to PCa development.<sup>1</sup> Given that PCa in younger men has a strong genetic component,<sup>2</sup> the influence of diabetic control and PRS on PCa may be different in this age group.

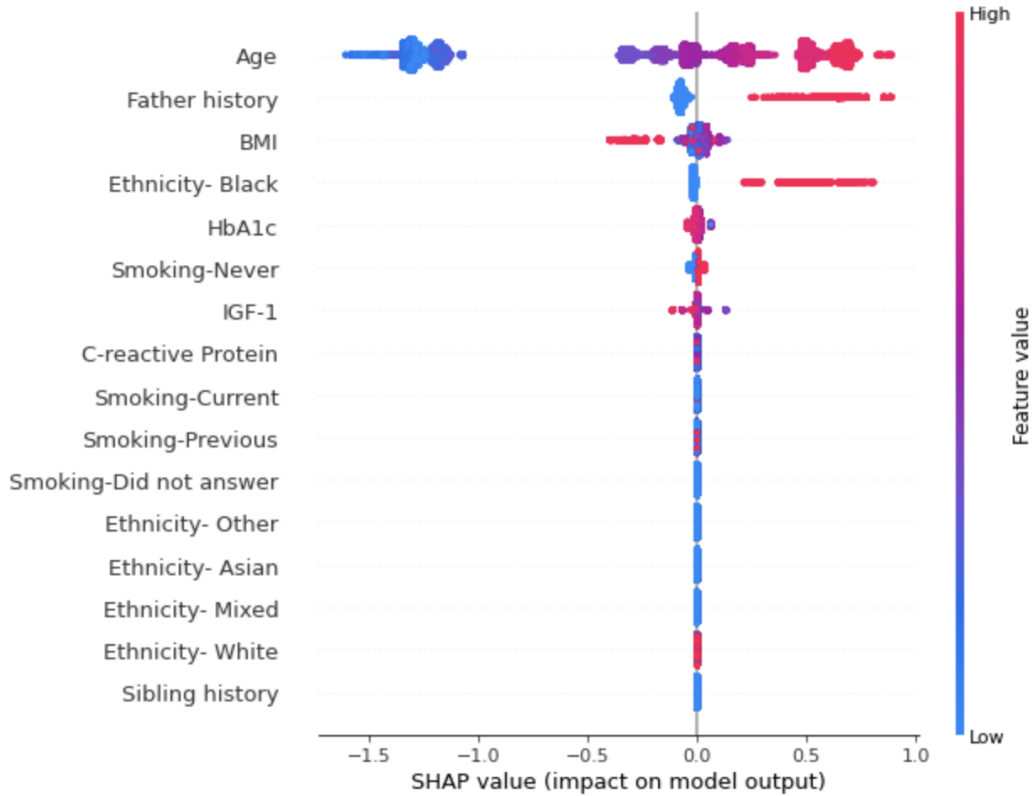

(D)

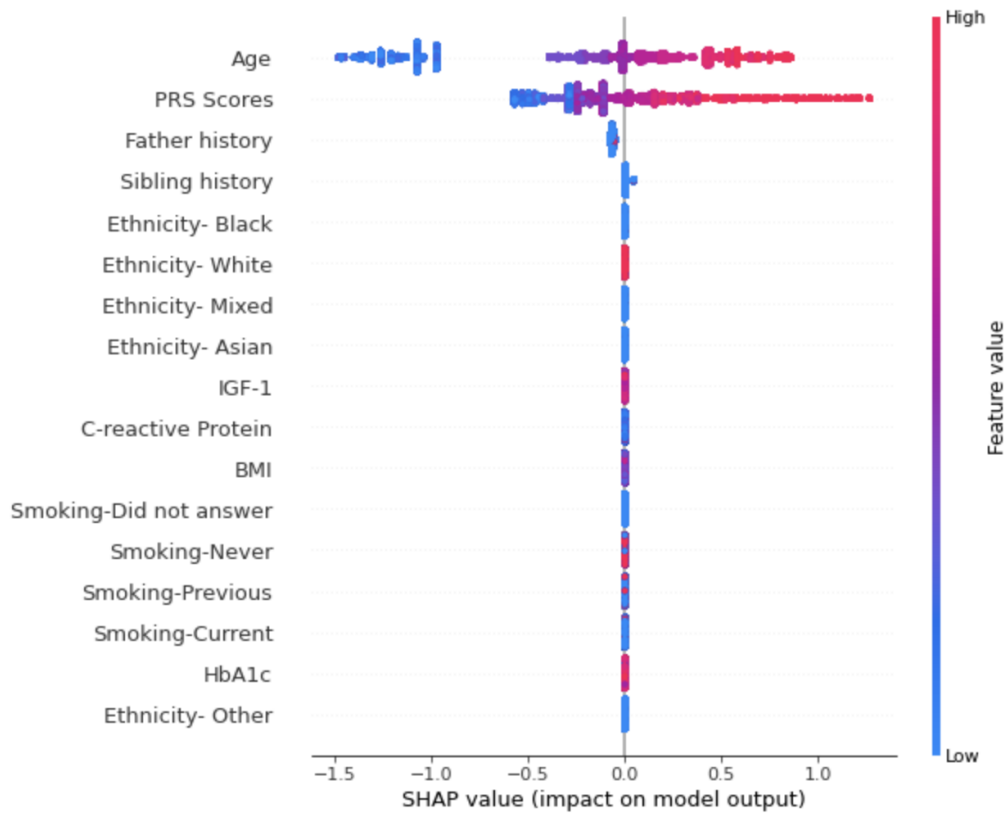

(E)

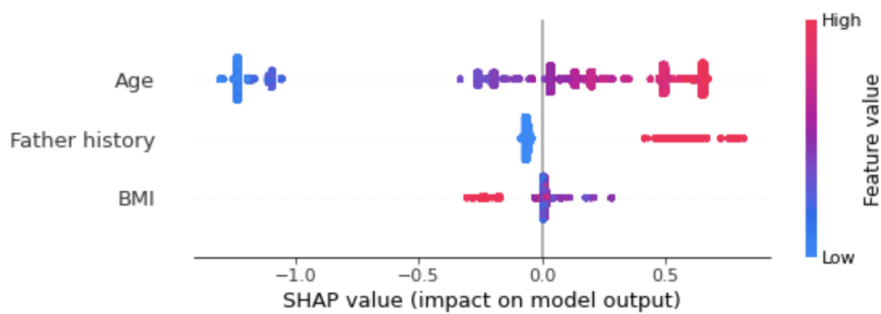

## References

1. Kasper JS, Liu Y, Pollak MN, Rifai N, Giovannucci E. Hormonal profile of diabetic men and the potential link to prostate cancer. *Cancer Causes Control*. 2008 Sep 1;19(7):703–10.
2. Salinas CA, Tsodikov A, Ishak-Howard M, Cooney KA. Prostate Cancer in Young Men: An Important Clinical Entity. *Nat Rev Urol*. 2014 Jun;11(6):317–23.
